# Supplementary material
Source: PubMed Central journal article supplement (PMC1913737)
Supplement: plntcell_tpc.107.051540_1.pdf [file plntcell_tpc.107.051540_1.pdf]

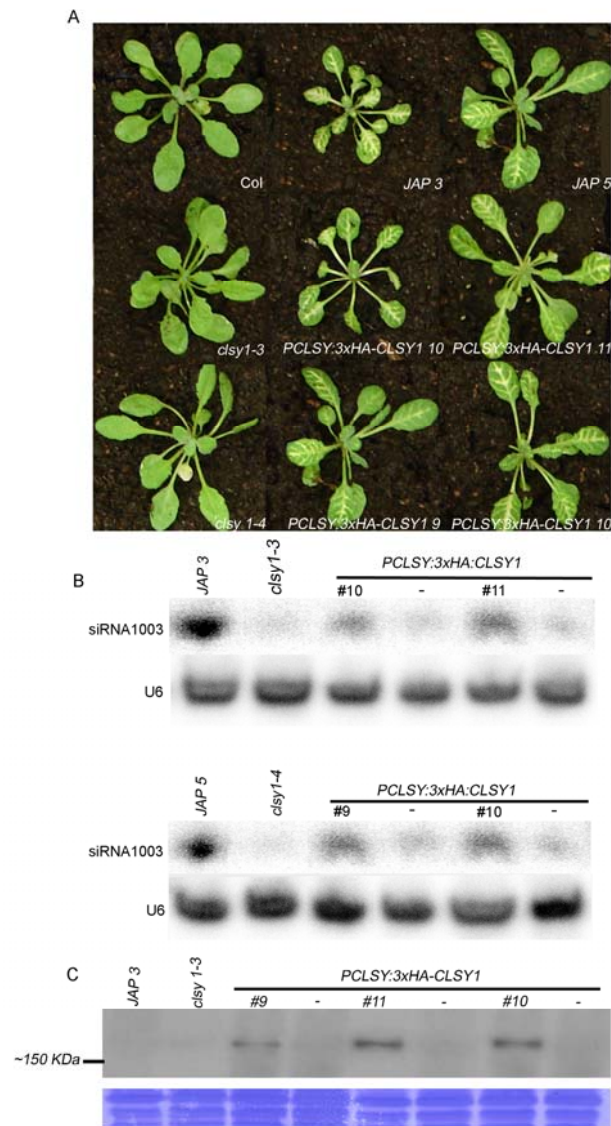

**Supplemental Figure 3. Complementation of the *clsy1-3* and *clsy1-4* mutants with a P<sub>CLS Y1</sub>:3xHA-CLS Y1 transgene**

A) Photobleaching caused by PDS silencing is restored in *clsy1-3* and *clsy1-4* mutant plants containing a P<sub>CLS Y1</sub>:3xHA-CLS Y1 transgene. Construction of the complementation transgene is described in the methods.

B) Introduction of the P<sub>CLS Y1</sub>:3xHA-CLS Y1 transgene partially restores levels of siRNA 1003 in both the *clsy1-3* and *clsy1-4* backgrounds as indicated by low molecular weight RNA gel blot analysis. Control F2 sibling plants from the *clsy1-3* crosses to *clsy1-4* P<sub>CLS Y1</sub>:3xHA-CLS Y1 that do not contain the P<sub>CLS Y1</sub>:3xHA-CLS Y1 transgene are indicated with a dash. Three independent P<sub>CLS Y1</sub>:3xHA-CLS Y1 transgenic lines are shown, #9, #10 and #11.

C) Western analysis of the lines from B) shows detection of the P<sub>CLS Y1</sub>:3xHA-CLS Y1 protein using a monoclonal antibody against the HA epitope tag (upper panel). Coomassie blue staining of the membrane as a loading control (lower panel).
